# Supplementary material
Source: publisher figshare collection journal article supplement (https://rs.figshare.com/ndownloader/files/23214596)
Supplement: Supplementary file 1 [file 23214596]

## Sheet: Hazen Blister 2017
Michelutti N, Douglas MSV, Antoniades D, Lehnherr I, St. Louis VL, St. Pierre K, Muir DCG, Brunskill G, and Smol JP. Contrasting the ecological effects of decreasing ice cover versus accelerated glacial melt on the High Arctic’s largest lake. Proc R Soc B. 10.1098/rspb
HAZEN Blister 2017
Sediment core interval mid-depth (cm)	0.25	1.25	2.25	3.25	4.25	5.25	6.25	7.25	8.25	9.25	10.25
Total cysts	135	32	35	11	24	5	5	5	5	4	3
Discostella stelligera	89	21	10	4			2				2
Lindavia antiqua			1
Lindavia bodanica	21	4	4		1	2	2	4			1
Lindavia ocellata		1		1
Lindavia rossii	57	8	5				1
Lindavia comensis			16
Achnanthes chlidanos	1
Achnanthes sensu lato spp	1
Achnanthidium minutissimum	15	14	4	11	2		5
Eucocconeis flexella	5	1
Eucocconeis laevis	3	2
Planothidium lanceolatum			2					1
Psammothidium bioretii				2
Psammothidium marginulatum	3	1
Rossithidium petersenii	1
Adlafia bryophila		1
Amphora inariensis	12	4			6	2
Amphora libyca				3
Aulacoseira alpigena			3			5	7	2
Aulacoseira ambigua		2	4
Aulacoseira canadensis	1
Aulacoseira distans	4	2	1	3				4	2
Aulacoseira granulata								3
Aulacoseira muzzanensis									2
Aulacoseira nivalis							1
Aulacoseira pusilla								1
Aulacoseira subarctica	1			1	3	5	3
Aulacoseira spp			1	4	1	2	3				1
Asterionella formosa								1
Brachysira brebisonii				4			3
Brachysira microcephala	1		1
Brachysira vitrea	2	2	2	1
Brachysira spp							2	4
Brevisira spp		1									1
Caloneis bacillum	1	2		1
Caloneis fasciata
Caloneis spp								1
Cocconeiformis placentula				1				1
Cymbella botellus
Cymbella cistula				1
Cymbella sinuata					1	1
Cymbella cf subaquealis	2
Cymbella sensu lato spp.	2						1
Cymbopleura incerta		2
Diatoma spp	1
Diploneis elliptica
Diploneis oculata		1
Diploneis parma	1
Encyonema minutum	2	2
Encyonema silesiacum	7	3	1					1
Encyonopsis cesatii				3				1
Encyonopsis descripta				1
Encyonopsis microcephala	4	1
Epithemia adnata								1
Eunotia cf minor				1
Eunotia incisa							1
Eunotia neaglii	2
Eunotia praerupta	1
Eunotia spp	1		1				1	2
Fragilaria capucina	1	2				4
Fragilaria tenera						4
Fragilariaformis virescens						1		1
Frustulia saxonica								1
Gomphonema angustum
Gomphonema parvulum				1			1
Gomphonema spp			4
Navicula cocconeiformis	1
Navicula cryptocephala	2						2
Navicula cryptotenella
Navicula minuscula				1
Navicula phyllepta	4
Navicula radiosa			1					2
Navicula soehrensis var hassiaca						2
Navicula cf atomus				2
Navicula cf utermehlii				1
Navicula spp.	1	1
Navicula sp#1		1
Navicula subrotundata	2
Nitzschia angustata
Nitzschia dissipata			2
Nitzschia fonticola				2	1		2	2
Nitzschia inconspicua			2			1
Nitzschia linearis
Nitzschia perminuta	2		2				3
Nitzschia pura
Nitzschia spp	1					2
Pinnularia interrupta				4
Pinnularia microstauron	1							4
Pinnularia sp. (cf. suchlandtii)
Pinnularia spp	1		1			1
Pseudostaurosira brevistriata		1			26	8		29	18	6	2
Pseudostaurosira construens							1
Pseudostaurosira pseudoconstruens	24	8	3		115	97	20	17	27	2
Pseudostaurosira parasitica				1
Pseudostuarosira elliptica					1
Rhopolodia gibba				1
Sellaphora pupula				3
Sellaphora pupula var mutica		1
Stauroneis anceps	1			1
Staurosira construens		1	21	2				11	12	8	1
Staurosira venter			2	1	9	9	11		4	8	1
Staurosirella pinnata	13		4	41	88	114	27	11	61	77	92
Stephanodiscus minutulus				2		2
Stephanodiscus spp 1	3				2		1
Surirella spp		1
Synedra cyclopum		2					3
Tabellaria spp	2		2
Unknown	2	11		2					1		1
TOTAL	302	104	100	107	256	262	103	105	127	101	102

## Sheet: Hazen Main 2017
Michelutti N, Douglas MSV, Antoniades D, Lehnherr I, St. Louis VL, St. Pierre K, Muir DCG, Brunskill G, and Smol JP. Contrasting the ecological effects of decreasing ice cover versus accelerated glacial melt on the High Arctic’s largest lake. Proc R Soc B. 10.1098/rspb
Lake Hazen Main 2017
Sediment core interval mid-depth (cm)	0.25	1.25	2.25	3.25	6.25	7.25	8.25	9.25	10.25	12.25	13.25	14.25	15.25	16.25	17.25	19.25	20.5
Total Cysts	59	48	16	18	17	16	25	19	10	62	9	7	10	1	4	2	48
Discostella stelligera	44	55	38	11	36	20	12	2	1				1
Lindavia antiqua
Lindavia bodanica	8	3	1	3		5	10	7		2
Lindavia ocellata			3
Lindavia rossii	40	20	6	4	29	59	48	10	6
Lindavia comensis							2
Achnanthes chlidanos	2				2
Achnanthes kryophila	1				2		1
Achnanthes sensu lato spp	1	2	1
Achnanthidium minutissimum	17	2	17		6	4	5			2
Eucocconeis flexella			3
Eucocconeis laevis	3		1						1
Planothidium lanceolatum		2	3							2
Psammothidium bioretii										1
Psammothidium marginulatum	2	1	2				1
Rossithidium petersenii	1
Rossithidium pusillum	1
Adlafia bryophila
Amphora inariensis	14			2	1		3	6	9	17	2	4	1	1
Amphora pediculus										1
Amphora libyca	1										1	1
Aulacoseira alpigena
Aulacoseira ambigua
Aulacoseira canadensis
Aulacoseira distans		4				1							1			3
Aulacoseira granulata
Aulacoseira muzzanensis
Aulacoseira nivalis
Aulacoseira pusilla
Aulacoseira subarctica
Aulacoseira spp	1		1	4		1				3
Asterionella formosa
Brachysira brebisonii
Brachysira microcephala	3	2					1
Brachysira vitrea		2	1							1
Brachysira spp						1
Brevisira spp
Caloneis bacillum	14				6			4		7	2
Caloneis fasciata
Caloneis spp	3		4	2		2		1	3
Cocconeiformis placentula			1							1
Cymbella botellus
Cymbella cistula
Cymbella hybrida								2
Cymbella lapponica					2
Reimeria sinuata			2	2	2							2
Cymbella cf subaquealis
Cymbella sensu lato spp.	2		2				1		14	3		2
Cymbopleura incerta	12					2
Delicata delicatula							1
Denticula kuetzingii	2
Denticula spp	2				2
Diadesmis spp
Diatoma monoliformis
Diatoma spp
Diploneis elliptica									1
Diploneis oculata
Diploneis parma	3			1			1	1
Encyonema gauemannii																	2
Encyonmena lange-bertalotii	3
Encyonema minutum																	2
Encyonema silesiacum	15		3		2	2	2	1	3	2
Encyonopsis cesatii
Encyonopsis descripta			1							2
Encyonopsis microcephala	2						1	1
Epithemia adnata
Eunotia cf minor
Eunotia incisa
Eunotia naeglii		1	1
Eunotia praerupta
Eunotia spp								1		3			1			1
Fragilaria capucina
Fragilaria tenera
Fragilariaformis virescens
Frustulia saxonica						1
Frustulia spp			1
Gomphonema angustum
Gomphonema parvulum					2
Gomphonema spp
Hannea arcus				4				1
Navicula absoluta
Navicula cocconeiformis
Navicula cryptocephala	2			1					1
Navicula cryptotenella
Navcula fracta							1
Navicula minuscula	5						1	2
Navicula modica
Navicula phyllepta		2
Navicula pseudoventralis			2
Navicula radiosa	1				2
Navicula soehrensis var hassiaca
Navicula cf atomus
Navicula cf utermehlii
Navicula spp.	4	2	6				2	5	2	8
Navicula sp#1	6	2	5	2	4	1	1		4	11
Navicula subrotundata
Nitzschia angustata
Nitzschia angustatula	1
Nitzschia dissipata
Nitzschia fonticola	4				1
Nitzschia frustulum		2			2			2
Nitzschia inconspicua
Nitzschia linearis
Nitzschia perminuta	10	4		2	6	2	2	1	2	2
Nitzschia pura
Nitzschia recta
Nitzschia spp	2			1
Pinnularia interrupta
Pinnularia microstauron
Pinnularia sp. (cf. suchlandtii)
Pinnularia spp		2		1										1	1	2
Pseudostaurosira brevistriata				1				4	8	6						4	16
P pseudoconstruens/S construens gv										52	213	106	31
Pseudostaurosira pseudoconstruens					1			1		3			7	48	50	39	1
Pseudostaurosira parasitica											2
Pseudostuarosira elliptica
Rhopolodia gibba
Sellaphora sp (cf. bacilloides)			1
Sellaphora pupula			1				1		1	1
Sellaphora pupula var mutica	1		1						1
Stauroforma exiguiformis						1
Stauroneis anceps
Stauroneis spp		3		3
Staurosira construens	67		5	1	32		3	52	40	8	13		1				45
Staurosira venter			2							4		5		12	30	10	1
Staurosirella pinnata	6		14	7	5	1	5	27	45	82	143	137	61	136	169	149	217
Stephanodiscus minutulus
Stephanodiscus spp 1	1
Surirella spp	1		1
Synedra cyclopum
Tabellaria spp
Unknown	7	3	1	2	4	2	1	2		1	2		1
TOTAL	315	114	131	54	149	105	106	133	142	225	378	257	105	198	250	208	284
